# Supplementary figures and images for: Mammographic screening detects low-risk tumor biology breast cancers
Source: Springer Nature journal article supplement (doi:10.1007/s10549-013-2830-5), 2014-01-27

Supplementary figure 1. Distribution of film-screen vs digital mammography over time

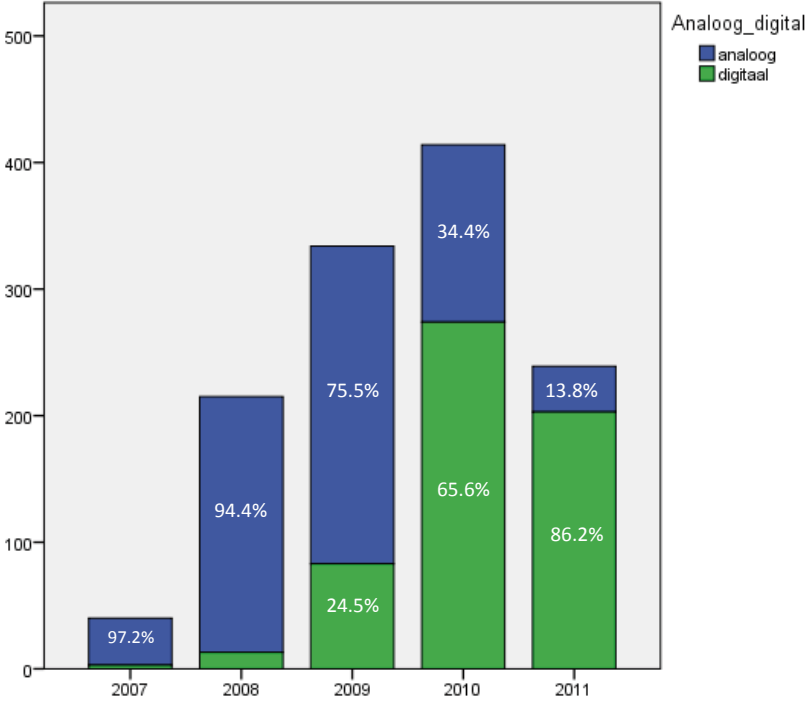

Supplement: MOESM2 [file 8845980]
